# Supplementary material for: Infinite building blocks for directed self-assembly of a supramolecular polyoxometalate–cyclodextrin framework for multifunctional oxidative catalysis
Source: Royal Society of Chemistry journal article supplement (doi:10.1039/d2qi02085h), 2022-01-01
Supplement: d2qi02085h1.pdf [file d2qi02085h1.pdf]

## Supplementary Information

# Infinite Building Blocks for Directed Self-Assembly of A Supramolecular Polyoxometalate-Cyclodextrin Framework for Multifunctional Oxidative Catalysis

Xiaohui Liu,<sup>‡ a</sup> Jinlin Zhang,<sup>‡ a</sup> Yuxin Lan,<sup>a</sup> Qi Zheng<sup>\*b</sup> and Weimin Xuan<sup>\*a</sup>

<sup>a</sup> College of Chemistry and Chemical Engineering & State Key Laboratory for Modification of Chemical Fibers and Polymer Materials, Donghua University, Shanghai 201620, P. R. China. E-mail: weiminxuan@dhu.edu.cn

<sup>b</sup> State Key Laboratory for Modification of Chemical Fibers and Polymer Materials & College of Materials Science and Engineering, Donghua University, Shanghai 201620, P. R. China. E-mail: qi.zheng@dhu.edu.cn

## Contents

|                                                                                                        |    |
|--------------------------------------------------------------------------------------------------------|----|
| 1. Materials.....                                                                                      | 3  |
| 2. Instrumentation .....                                                                               | 3  |
| 3. Synthesis .....                                                                                     | 4  |
| 4. Crystallographic data and crystal structures of 1.....                                              | 6  |
| 5. Bond valence sum (BVS) calculations of Mn, Ce and V atoms in 1.....                                 | 7  |
| 6. NMR spectra of 1 and $\alpha$ -CD .....                                                             | 8  |
| 7. FT-IR spectra of {MnV <sub>13</sub> }, {PW <sub>10</sub> V <sub>2</sub> }, $\alpha$ -CD and 1 ..... | 10 |
| 8. Dye adsorption by 1 and 1-CL <sub>0.5</sub> .....                                                   | 11 |
| 9 PXRD spectra of 1 and 1-CL <sub>0.5</sub> .....                                                      | 12 |
| 10. TGA result of 1 and 1-CL <sub>0.5</sub> .....                                                      | 13 |
| 11. FT-IR spectra of 1, 1-CL <sub>0.5</sub> and HDI.....                                               | 13 |
| 12. The general procedure of sulfoxidation by 1 .....                                                  | 15 |
| 13. The general procedure of sulfoxidation by 1-CL <sub>0.5</sub> at r.t.....                          | 20 |

|                                                                                         |    |
|-----------------------------------------------------------------------------------------|----|
| <b>14. The general procedure of sulfoxidation by 1-CL<sub>0.5</sub> at 40 °C.</b> ..... | 21 |
| <b>15. General process of oxidative cleavage of alkenes by 1-CL<sub>0.5</sub></b> ..... | 24 |
| <b>16. Recycling experiments</b> .....                                                  | 30 |
| <b>17. References</b> .....                                                             | 31 |

## 1. Materials

$\text{Na}_7[\text{MnV}_{13}\text{O}_{38}] \cdot 18\text{H}_2\text{O}$ <sup>[1]</sup>,  $\text{Na}_9[\alpha\text{-PW}_9\text{O}_{34}] \cdot 7\text{H}_2\text{O}$ <sup>[2]</sup> and  $\text{K}_5\text{PW}_{10}\text{V}_2\text{O}_{40}$ <sup>[3]</sup> were synthesized according to the literature.  $\text{Ce}(\text{NO}_3)_3 \cdot 6\text{H}_2\text{O}$  was purchased from Admas-beta,  $\alpha\text{-CD}$  was purchased from Rhawn, Ltd, respectively. All reagents were of A.R. grade and used without further purification.

## 2. Instrumentation

**Crystallography:** Single-crystal X-ray diffraction data of **1** was collected at 150 K at Donghua University (Shanghai) using Mo-K $\alpha$  ( $\lambda = 0.71073 \text{ \AA}$ ) Bruker D8 venture X-ray single crystal diffractometer for several times, and the best dataset was chosen to be indexed, integrated and scaled using the APEX 3 program<sup>[4]</sup>. The structure was solved by the direct methods with ShelXT<sup>[5]</sup> and refined with ShelXL<sup>[6]</sup> using OLEX 2<sup>[7]</sup>. All non-hydrogen atoms are anisotropic refined by the least square method, and the hydrogen atoms are determined by the ideal geometry by the theoretical hydrogenation method. CCDC-2209404 (**1**), contain the supplementary crystallographic data for this paper. These data can be obtained free of charge via [www.ccdc.cam.ac.uk/data\\_request/cif](http://www.ccdc.cam.ac.uk/data_request/cif).

**Element Analyses:** C, N and H content were determined by VARIDEL III Elemental Analyzer. The contents of Mn, V, Ce, P, W and Na were determined from Prodigy-ICP plasma spectrometer by dissolving 2 mg of **1** in 10 mL of 1M  $\text{HNO}_3$  solution.

**Thermogravimetric Analysis (TGA):** Thermogravimetric analysis was performed on a METTLER TOLEDO TG8000 Thermogravimetric Analyzer under nitrogen flow at a typical heating rate of  $10 \text{ }^\circ\text{C} \cdot \text{min}^{-1}$ .

**Powder X-ray Diffraction (PXRD):** Powder XRD was recorded on a Haoyuan DX-2700B

diffractometer equipped with monochromatized Cu-K $\alpha$  ( $\lambda = 1.5418 \text{ \AA}$ ) radiation in the range of  $3^\circ \leq 2\theta \leq 50^\circ$ , with a scanning rate of  $0.04^\circ \text{ s}^{-1}$ .

**Fourier-transform infrared (FT-IR) spectroscopy:** The samples were prepared as a KBr pellet and the FT-IR spectrum was collected in transmission mode in the range of 500-4000  $\text{cm}^{-1}$  using a NEXUS-670 spectrometer. Wavenumbers are given in  $\text{cm}^{-1}$ . Intensities are denoted as w = weak, m = medium, s = strong, vs = very strong, br = broad.

**GC mass spectra:** GC-Mass analysis was carried out on Agilent 8860 GC system and 5977B GC/MSD system with EI mode

**Nuclear Magnetic Resonance Spectroscopy:** All the NMR spectra were recorded on Bruker AVANCE III HD 600MHz spectrometer. The experimental details are described as bellow: **1** (30mg) was added to a solution of 800  $\mu\text{L}$  1M DCl and sonicated for 10 minutes to make a clear solution. After filtration, the liquid is transferred to 5 mm NMR tube for  $^1\text{H}$  NMR and  $^{31}\text{P}$  NMR test at Larmor frequencies of 600.0 and 162.0 MHz, respectively. The solid-state  $^{13}\text{C}$  NMR and  $^{31}\text{P}$  NMR spectra were collected on the 600MHz spectrometer utilizing a 1.9 mm Bruker HXY probe at a MAS frequency of 30 kHz with sample loading of 200 mg.

### 3. Synthesis

#### Synthesis of $\text{H}_2\text{Ce}_3(\text{H}_2\text{O})_{13}(\text{MnV}_{12}\text{O}_{38})_{0.5}(\text{PW}_{10}\text{V}_2\text{O}_{40})(\text{C}_{36}\text{H}_{60}\text{O}_{30}) \cdot 20\text{H}_2\text{O}$ . (**1**)

$\text{Na}_7[\text{MnV}_{13}\text{O}_{38}] \cdot 18\text{H}_2\text{O}$  (0.01 mmol, 18 mg),  $\text{Na}_9[\alpha\text{-PW}_9\text{O}_{34}] \cdot 7\text{H}_2\text{O}$  (0.02 mmol, 48.2 mg) and  $\alpha\text{-CD}$  (0.056 mmol, 54.5 mg) were dissolved in  $\text{H}_2\text{O}$  (2 mL) (Solution A),  $\text{Ce}(\text{NO}_3)_3 \cdot 6\text{H}_2\text{O}$  was dissolved in  $\text{H}_2\text{O}$  (0.5 mL)(Solution B), then add solution B to solution A under stirring conditions, stir at room temperature for a few minutes. The resultant solution was heated at  $40^\circ\text{C}$  for 2 hours. After cooled to room temperature, The solution was filtered in a 10ml small glass bottle and volatilized at room temperature, Yellow rod crystals were obtained after two weeks. (yield: 41.00 mg, 40.36 % based on  $\text{Na}_7[\text{MnV}_{13}\text{O}_{38}] \cdot 18\text{H}_2\text{O}$ ). Anal. Calcd for

$\text{H}_2\text{Ce}_3(\text{H}_2\text{O})_{13}(\text{MnV}_{12}\text{O}_{38})_{0.5}(\text{PW}_{10}\text{V}_2\text{O}_{40})(\text{C}_{36}\text{H}_{60}\text{O}_{30}) \cdot 20\text{H}_2\text{O}$  (MW = 5236.74), EA(%): Mn: 0.52; V: 7.78; Ce: 8.02; P: 0.59; W: 35.10; Na: 0.00; C: 8.25; H: 2.46; found: Mn: 0.59; V: 8.04; Ce: 8.27; P: 0.59; W: 35.45; Na: 0.02; C: 8.34; H: 2.45. IR (KBr pellet, 4000 - 500  $\text{cm}^{-1}$ ): 3310, 2923, 1617, 1340, 1150, 1076, 1029, 952, 916, 792, 599, 514, 423.

### Synthesis of **1-CL**<sub>0.5</sub>

Compound **1** was immersed in anhydrous THF for solvent exchange and then vacuated at 120 °C for 24 hours to remove guest water molecules. The dried **1** (0.02 mmol, 105 mg) was then added into a 10ml three neck flask, followed by addition of hexamethylene diisocyanate (0.18 mmol, 32 $\mu$ L, 0.5 equivalent of 18 hydroxyl groups on  $\alpha$ -cyclodextrin) and dry DMF (2 mL). The mixture was then heated at 70 °C for 24h, filtered and washed by isopropyl alcohol to afford **1-CL**<sub>0.5</sub> as yellow powder. (yield: 103.00 mg, 75.79 % based on compound **1**). Anal. Calcd for  $\text{H}_2\text{Ce}_3(\text{H}_2\text{O})_{13}(\text{MnV}_{12}\text{O}_{38})_{0.5}(\text{PW}_{10}\text{V}_2\text{O}_{40})(\text{C}_{36}\text{H}_{60}\text{O}_{30})(\text{HDI})_9(\text{DMF})_6$  (MW = 6826.739), EA(%): Mn: 0.40; V: 5.97; Ce: 6.16; P: 0.45; W: 26.93; C: 22.15; H: 3.45; N: 4.92; found: Mn: 0.48; V: 6.04; Ce: 6.34; P: 0.41; W: 27.15, C: 22.42; H: 3.65; N: 4.66. IR (KBr pellet, 4000 - 500  $\text{cm}^{-1}$ ): 3320, 2929, 2854, 1616, 1569, 1253, 1049, 912, 794, 599, 514, 423.

#### 4. Crystallographic data and crystal structures of **1**

**Table S1** Crystallographic Details for **1**

| Compound                                               | <b>1</b>                                                                                                             |
|--------------------------------------------------------|----------------------------------------------------------------------------------------------------------------------|
| Empirical formula                                      | C <sub>36</sub> H <sub>138</sub> Ce <sub>3</sub> Mn <sub>0.50</sub> O <sub>127</sub> PV <sub>8</sub> W <sub>10</sub> |
| Formula weight                                         | 5328.28                                                                                                              |
| Crystal system                                         | Orthorhombic                                                                                                         |
| Space group                                            | P2 <sub>1</sub> 2 <sub>1</sub> 2                                                                                     |
| a /Å                                                   | 30.250(9)                                                                                                            |
| b /Å                                                   | 36.327(10)                                                                                                           |
| c /Å                                                   | 17.050(4)                                                                                                            |
| α/°                                                    | 90                                                                                                                   |
| β/°                                                    | 90                                                                                                                   |
| γ/°                                                    | 90                                                                                                                   |
| V /Å <sup>3</sup>                                      | 18736(9)                                                                                                             |
| Z                                                      | 4                                                                                                                    |
| ρ calc /g·cm <sup>-3</sup>                             | 1.889                                                                                                                |
| μ(MoKα) /mm <sup>-1</sup>                              | 7.332                                                                                                                |
| F(000)                                                 | 9982                                                                                                                 |
| 2θ range /°                                            | 1.885 to 25.326                                                                                                      |
|                                                        | -36<=h<=36                                                                                                           |
| Index ranges                                           | -43<=k<=43                                                                                                           |
|                                                        | -20<=l<=20                                                                                                           |
| Reflections collected                                  | 298878                                                                                                               |
| Data / restraints / parameters                         | 34151 / 45 / 1453                                                                                                    |
| R <sub>1</sub> /wR <sub>2</sub> (I>2σ(I)) <sup>a</sup> | 0.0460/0.1134                                                                                                        |
| R <sub>1</sub> /wR <sub>2</sub> (all data)             | 0.0502/0.1165                                                                                                        |
| GooF (all data) <sup>b</sup>                           | 1.044                                                                                                                |
| Data completeness                                      | 99.9%                                                                                                                |

$$^a R_1 = \sum ||F_o| - |F_c|| / \sum |F_o|; wR_2 = \{ \sum w[(F_o)^2 - (F_c)^2]^2 / \sum w[(F_o)^2]^2 \}^{1/2}$$

$$^b \text{GooF} = \{ \sum w[(F_o)^2 - (F_c)^2]^2 / (n-p) \}^{1/2}$$

## 5. Bond valence sum (BVS) calculations of Mn, Ce and V atoms in 1

**Table S2** Bond valence sum (BVS) calculations of Mn, Ce and V atoms in compound 1.

| compound 1 | BVS calc. for Mn (III) | BVS calc. for Mn (IV) |
|------------|------------------------|-----------------------|
| Mn1        | 3.8456                 | 4.0248                |

  

| compound 1 | BVS calc. for Ce (III) | BVS calc. for Ce (IV) |
|------------|------------------------|-----------------------|
| Ce1        | 3.263                  | 2.740                 |
| Ce2        | 3.265                  | 2.756                 |
| Ce3        | 3.265                  | 2.864                 |

  

| compound 1 | BVS calc. for V (IV) | BVS calc. for V (V) |
|------------|----------------------|---------------------|
| V1         | 4.694                | 4.995               |
| V2         | 4.790                | 5.097               |
| V3         | 4.593                | 4.888               |
| V4         | 4.593                | 4.888               |
| V5         | 4.694                | 4.995               |

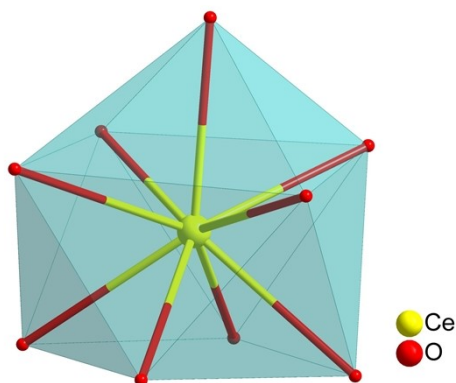

**Figure S1** Mono-capped square antiprism configuration of Ce<sup>3+</sup> in compound 1

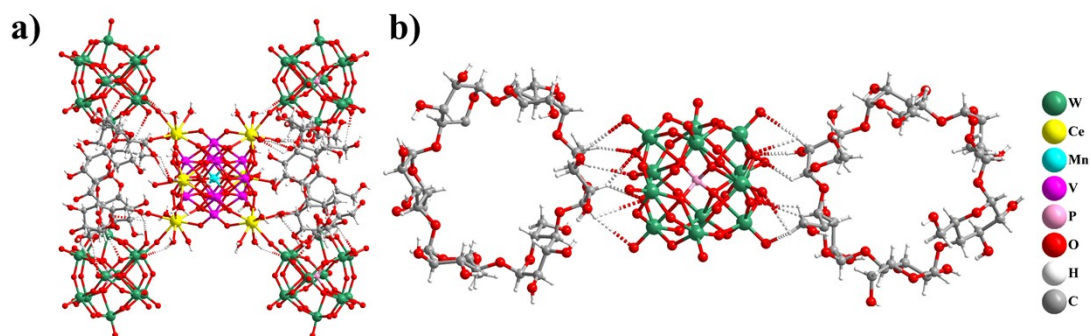

**Figure S2** Multiple hydrogen bonding between coordinated H<sub>2</sub>O on Ce centers (a), {PW<sub>10</sub>V<sub>2</sub>} (b) and  $\alpha$ -CD in compound **1**

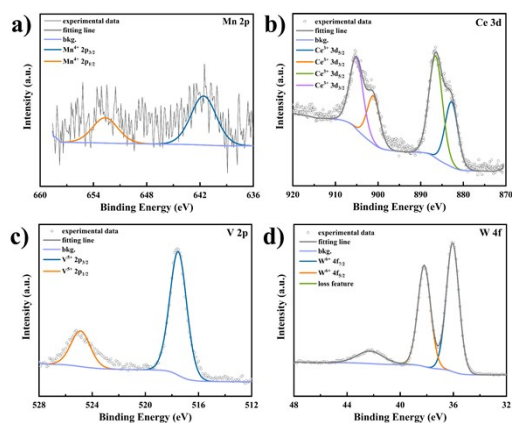

**Figure S3** The XPS analysis of a) Mn; b) Ce; c) V; d) W in compound **1**

## 6. NMR spectra of **1** and $\alpha$ -CD

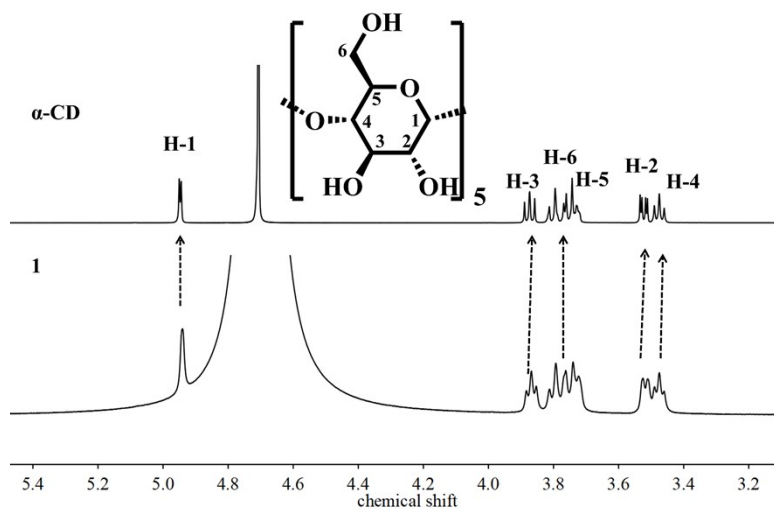

**Figure S4** <sup>1</sup>H NMR spectra of **1** and  $\alpha$ -CD in a mixture of DCl and D<sub>2</sub>O



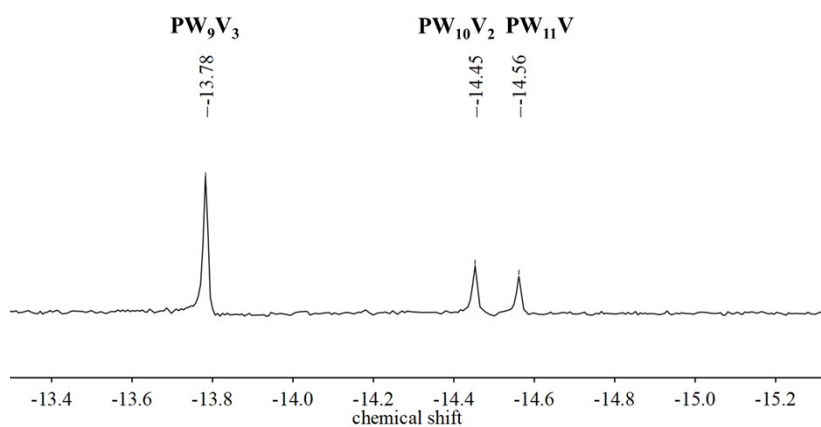

**Figure S5**  $^{31}\text{P}$  NMR spectrum of **1** in a mixture of DCl and D<sub>2</sub>O, {PW<sub>9</sub>V<sub>3</sub>} ( $\delta$  13.78 ppm), {PW<sub>10</sub>V<sub>2</sub>} ( $\delta$  14.45 ppm) and {PW<sub>11</sub>V} ( $\delta$  14.56 ppm)

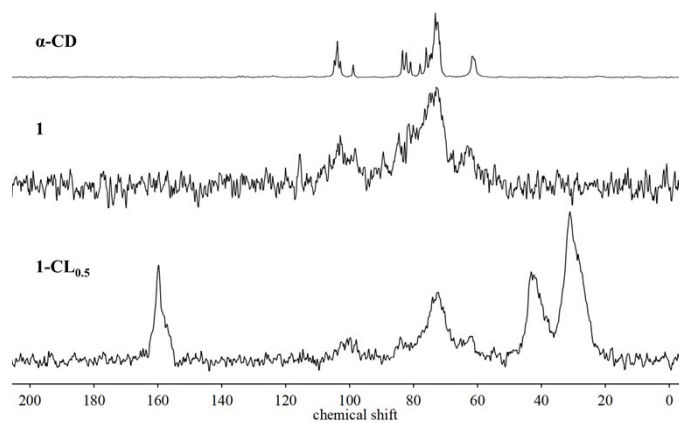

**Figure S6** Solid-state  $^{13}\text{C}$  NMR spectra of  $\alpha$ -CD, **1** and **1-CL<sub>0.5</sub>**

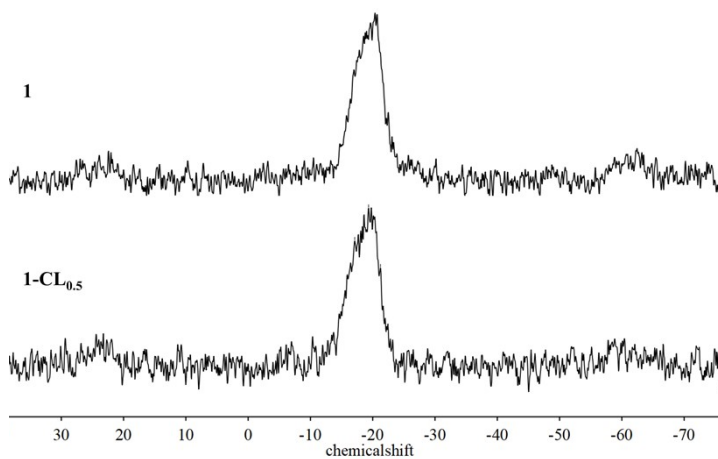

**Figure S7** Solid-state  $^{31}\text{P}$  NMR spectra of **1** and **1-CL<sub>0.5</sub>**

## 7. FT-IR spectra of $\{\text{MnV}_{13}\}$ , $\{\text{PW}_{10}\text{V}_2\}$ , $\alpha\text{-CD}$ and **1**

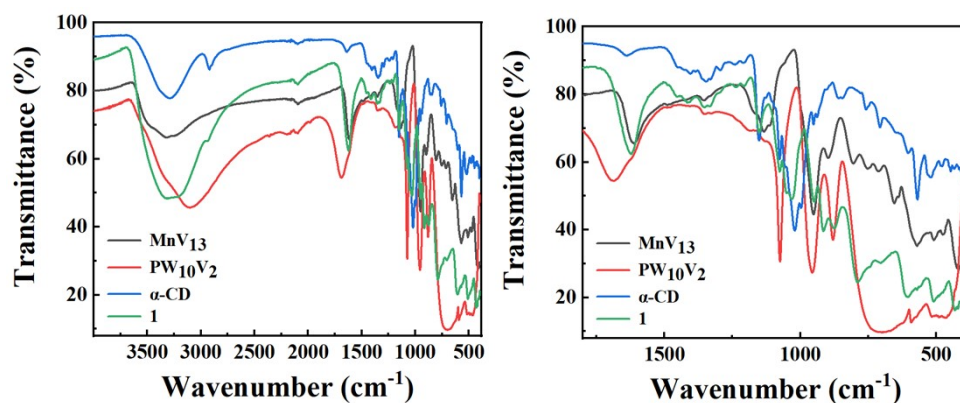

**Figure S8** The FT-IR spectra of  $\text{Na}_7[\text{MnV}_{13}]\cdot 18\text{H}_2\text{O}$  ( $\{\text{MnV}_{13}\}$ ),  $\text{K}_5\text{PW}_{10}\text{V}_2\text{O}_{40}$  ( $\{\text{PW}_{10}\text{V}_2\}$ ),  $\alpha\text{-CD}$  and **1**.

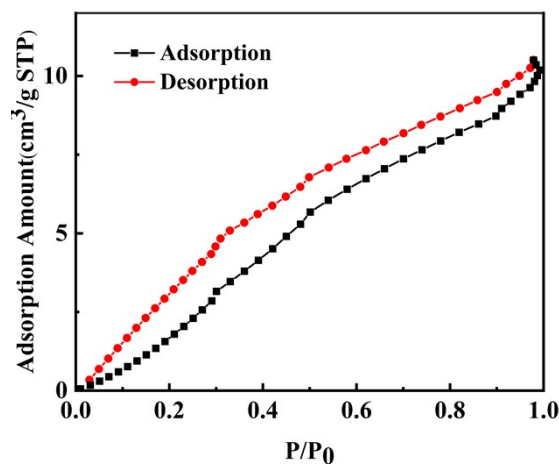

**Figure S9** N<sub>2</sub> adsorption of **1**.

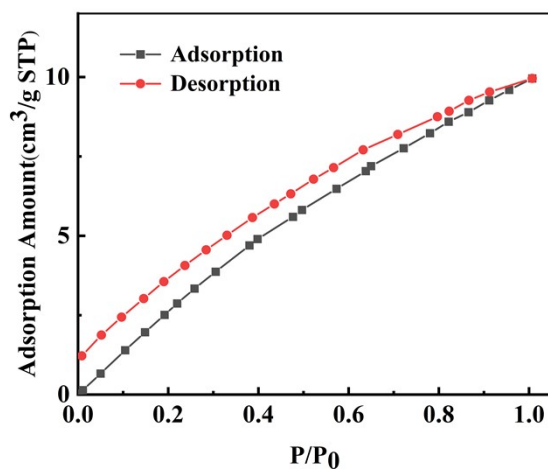

**Figure S10** CO<sub>2</sub> adsorption of **1**.

## 8. Dye adsorption by 1 and 1-CL<sub>0.5</sub>

**Preparation of the working curves of Dyes:** The standard solutions of rhodamine B (RB) and methylene blue (MB) were prepared in a sequential concentration of 1mg/L, 5mg/L, 10mg/L, 15mg/L and 20mg/L, respectively. These standard solutions were then tested by Uv-Vis spectrometer to make working curves based on the relationship between absorption and concentration.

**Dye adsorption experiment:** Taking 3 mL of 20mg/L standard solution (RB/MB) into a 50 mL glass bottle, 3 mg 1/1-CL<sub>0.5</sub> was subsequently added and stirred for 24 hours. The solution was then filtered and used for testing its absorbance with a spectrometer. The amount of absorbed dye molecules per formula was evaluated by comparing their absorbances with the working curves.

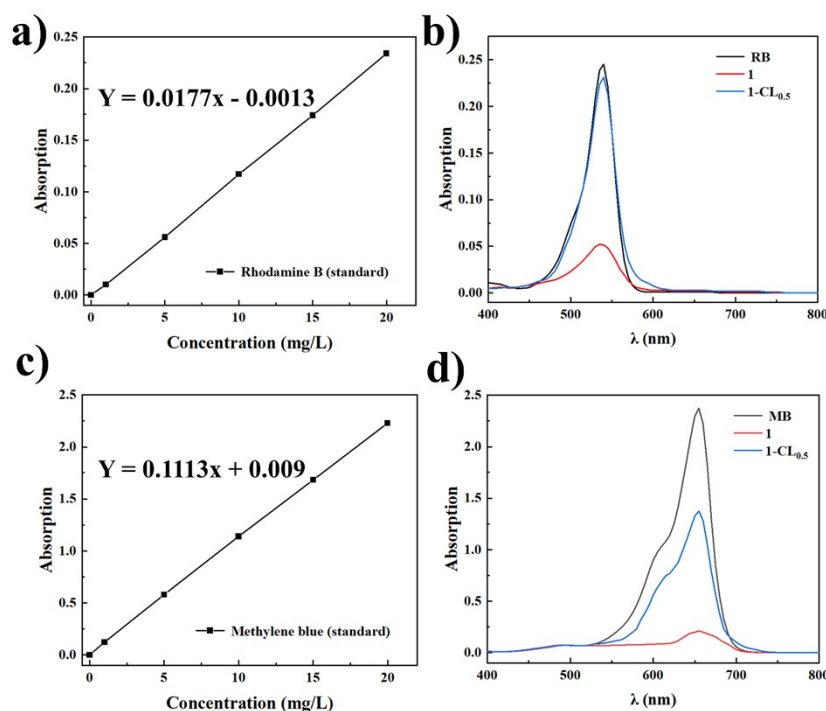

**Figure S11** UV-Vis absorption spectra of Rhodamine B (RB) and methylene blue (MB) solution before and after adsorption by 1 and 1-CL<sub>0.5</sub>. RB/MB (20 mg/L, 3 mL), 1/1-CL<sub>0.5</sub> (3 mg), 24 h.

## 9 PXRD spectra of 1 and 1-CL<sub>0.5</sub>

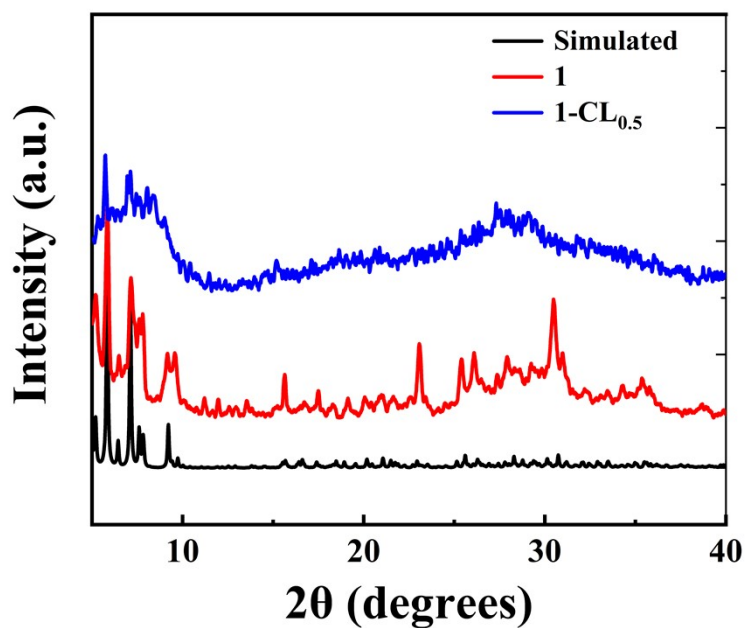

Figure S12 Experimental and simulated PXRD patterns of 1 and 1-CL<sub>0.5</sub>.

## 10. TGA result of 1 and 1-CL<sub>0.5</sub>

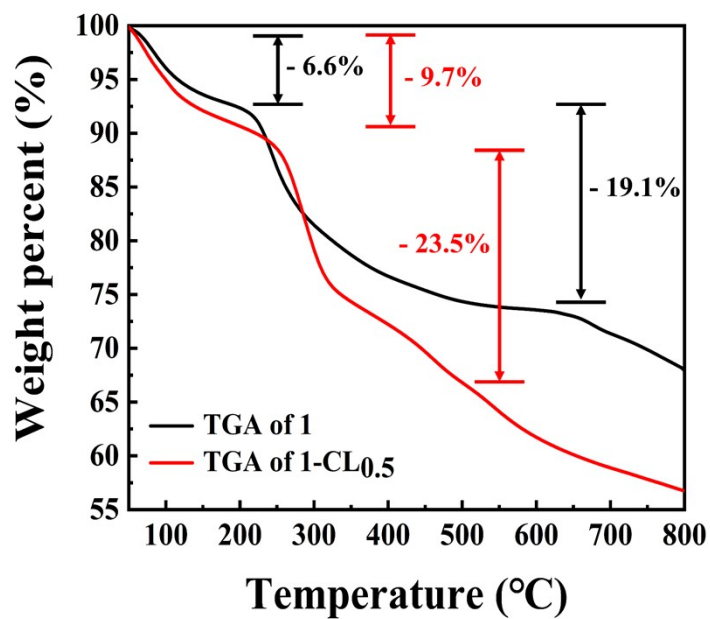

Figure S13 TGA curve for 1 and 1-CL<sub>0.5</sub>.

## 11. FT-IR spectra of 1, 1-CL<sub>0.5</sub> and HDI

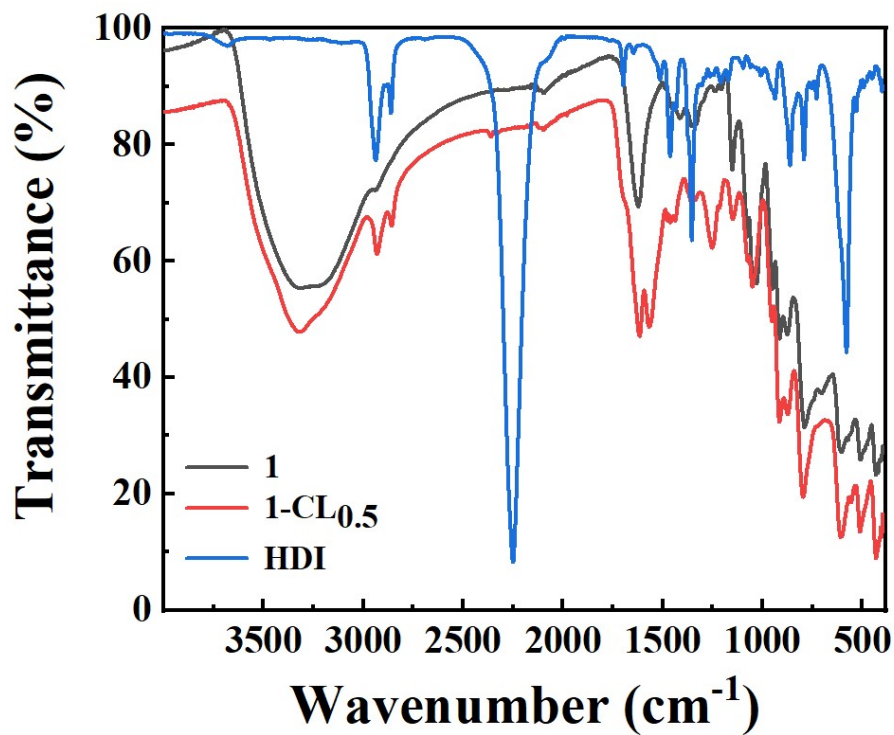

Figure S14 The FT-IR spectra of 1, 1-CL<sub>0.5</sub> and hexamethylene diisocyanate(HDI)

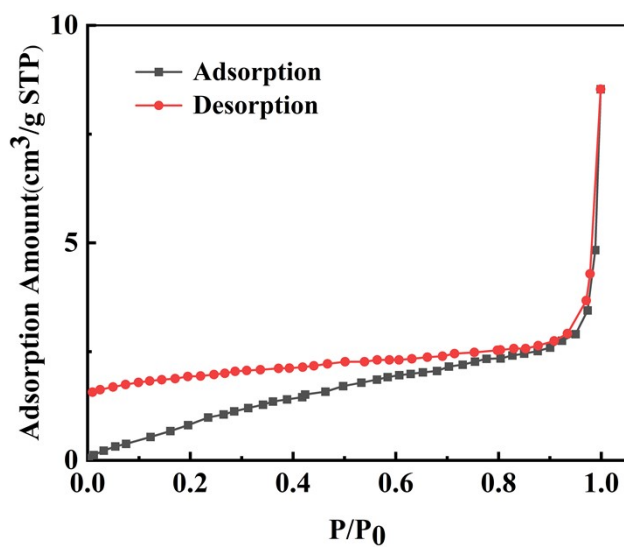

Figure S15  $\text{N}_2$  adsorption of 1-CL<sub>0.5</sub>

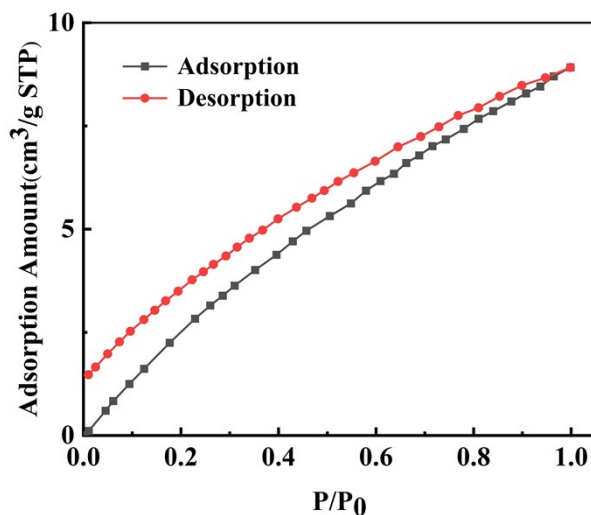

**Figure S16** CO<sub>2</sub> adsorption of **1-CL<sub>0.5</sub>**

## 12. The general procedure of sulfoxidation by **1**

Compound **1** (0.4 mol%), sulfide (0.2 mmol), H<sub>2</sub>O<sub>2</sub> (1.05 eq), internal standard (mesitylene 0.2 mmol) and solvent (2 mL) are added into the test tube (φ20 mm × 170 mm), and the magnetic stir bar coated with PTFE is added for stirring at room temperature for certain time. After the reaction, the reaction solution is tested by GC-MS, and the products are confirmed by comparison of their GC-Mass spectra with those of authentic data, and the yield is calculated according to the internal standard. Thioanisole is taken as a model compound. Similarly, we screen solvent, the amount of catalyst and H<sub>2</sub>O<sub>2</sub>. After the reaction, the catalyst is deposited at the bottom of the centrifuge tube by centrifugation, which is conducive to the recovery of the catalyst. The recovered catalyst is washed with methanol and dried.

**Table S3 Screening the solvents for catalytic oxidation of sulfides<sup>a</sup>**

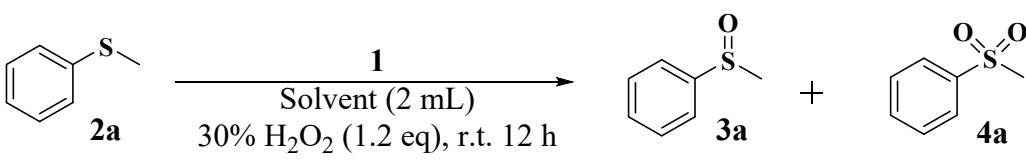

| Entry | solvent                  | Yields (%) <sup>b</sup> |      |
|-------|--------------------------|-------------------------|------|
|       |                          | 3a                      | 4a   |
| 1     | Methanol                 | 83                      | 17   |
| 2     | Ethanol                  | 45                      | 25   |
| 3     | Acetonitrile             | 25                      | 5    |
| 4     | Ethyl ether              | 24                      | 39   |
| 5     | Ethyl acetate            | 22                      | 41   |
| 6     | Acetone                  | 10                      | n.d. |
| 7     | 2-Butanone               | 37                      | 11   |
| 8     | Dichloromethane          | 38                      | 7    |
| 9     | (trifluoromethyl)benzene | 10                      | 45   |
| 10    | Tetrahydrofuran          | 26                      | 4    |
| 11    | Trichloromethane         | 41                      | 18   |
| 12    | N,N-Dimethylformamide    | 25                      | n.d. |
| 13    | Dimethyl sulfoxide       | n.d.                    | n.d. |

<sup>a</sup>Reaction conditions: 2a (0.2 mmol), **1** (0.4 mol%), 30% H<sub>2</sub>O<sub>2</sub> (1.2 eq), r.t., methanol (2 mL), 12 h.

<sup>b</sup>Yields are determined by GC-MS using mesitylene as an internal standard. The “n.d.” means “not detected”.

**Table S4 Screening the amount of catalyst for catalytic oxidation of sulfides<sup>a</sup>**

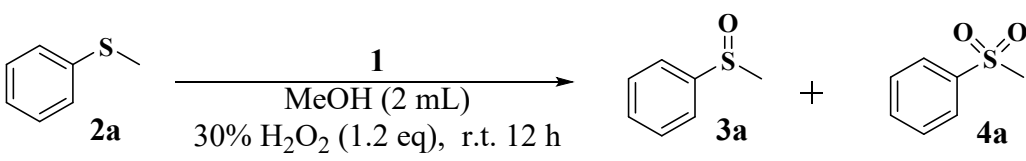

| Entry | Amount of catalyst (mol%) | Yields (%) <sup>b</sup> |    |
|-------|---------------------------|-------------------------|----|
|       |                           | 3a                      | 4a |
| 1     | 0.1                       | 90                      | 3  |
| 2     | 0.2                       | 92                      | 8  |
| 3     | 0.4                       | 95                      | 5  |
| 4     | 0.6                       | 87                      | 13 |

<sup>a</sup>Reaction conditions: 2a (0.2 mmol), 30% H<sub>2</sub>O<sub>2</sub> (1.2 eq), r.t., methanol (2 mL), 12 h. <sup>b</sup>Yields are determined by GC-MS using mesitylene as an internal standard.

**Table S5 Screening the amount of H<sub>2</sub>O<sub>2</sub> for catalytic oxidation of sulfides<sup>a</sup>**

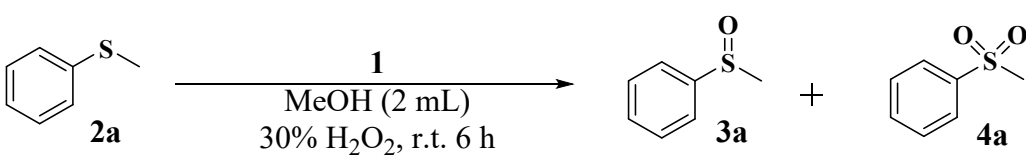

| Entry | Oxidant/substrate (eq) | Yields (%) <sup>b</sup> |      |
|-------|------------------------|-------------------------|------|
|       |                        | 3a                      | 4a   |
| 1     | 1.00                   | 86                      | n.d. |
| 2     | 1.05                   | 95                      | 5    |
| 3     | 1.10                   | 94                      | 2    |
| 4     | 1.20                   | 93                      | 4    |
| 5     | 1.30                   | 93                      | 7    |
| 6     | 1.40                   | 90                      | 10   |

<sup>a</sup>Reaction conditions: 2a (0.2 mmol), **1** (0.4 mol%), 30% H<sub>2</sub>O<sub>2</sub>, r.t., methanol (2 mL), 6 h. <sup>b</sup>Yields are determined by GC-MS using mesitylene as an internal standard. The “n.d.” means “not detected”.



**Table S6 Catalytic oxygenation of 2a using various catalysts and methanol as solvent<sup>a</sup>**

| Entry          | Catalyst                                                                                                                                                                                          | Yields (%) <sup>b</sup> |           |
|----------------|---------------------------------------------------------------------------------------------------------------------------------------------------------------------------------------------------|-------------------------|-----------|
|                |                                                                                                                                                                                                   | 3a                      | 4a        |
| 1              | <b>1</b>                                                                                                                                                                                          | 95                      | 5         |
| 2 <sup>c</sup> | —                                                                                                                                                                                                 | 7                       | n.d.      |
| 3 <sup>d</sup> | Na <sub>7</sub> [MnV <sub>13</sub> ]·18H <sub>2</sub> O                                                                                                                                           | 60                      | 40        |
| 4 <sup>e</sup> | K <sub>5</sub> PW <sub>10</sub> V <sub>2</sub> O <sub>40</sub>                                                                                                                                    | 30                      | n.d.      |
| 5 <sup>f</sup> | Ce(NO <sub>3</sub> ) <sub>3</sub> ·6H <sub>2</sub> O                                                                                                                                              | 55                      | Trac<br>e |
| 6 <sup>g</sup> | α-cyclodextrin                                                                                                                                                                                    | n.d.                    | n.d.      |
| 7              | Na <sub>7</sub> [MnV <sub>13</sub> ]·18H <sub>2</sub> O, K <sub>5</sub> PW <sub>10</sub> V <sub>2</sub> O <sub>40</sub>                                                                           | 83                      | 14        |
| 8              | Na <sub>7</sub> [MnV <sub>13</sub> ]·18H <sub>2</sub> O, Ce(NO <sub>3</sub> ) <sub>3</sub> ·6H <sub>2</sub> O                                                                                     | 83                      | 17        |
| 9              | Na <sub>7</sub> [MnV <sub>13</sub> ]·18H <sub>2</sub> O, α-cyclodextrin                                                                                                                           | 88                      | 12        |
| 10             | K <sub>5</sub> PW <sub>10</sub> V <sub>2</sub> O <sub>40</sub> , Ce(NO <sub>3</sub> ) <sub>3</sub> ·6H <sub>2</sub> O                                                                             | 83                      | 12        |
| 11             | Na <sub>7</sub> [MnV <sub>13</sub> ]·18H <sub>2</sub> O, K <sub>5</sub> PW <sub>10</sub> V <sub>2</sub> O <sub>40</sub> , Ce(NO <sub>3</sub> ) <sub>3</sub> ·6H <sub>2</sub> O                    | 88                      | 7         |
| 12             | K <sub>5</sub> PW <sub>10</sub> V <sub>2</sub> O <sub>40</sub> , α-cyclodextrin                                                                                                                   | 24                      | Trac<br>e |
| 13             | Ce(NO <sub>3</sub> ) <sub>3</sub> ·6H <sub>2</sub> O, α-cyclodextrin                                                                                                                              | 48                      | 3         |
| 14             | Na <sub>7</sub> [MnV <sub>13</sub> ]·18H <sub>2</sub> O, K <sub>5</sub> PW <sub>10</sub> V <sub>2</sub> O <sub>40</sub> , α-cyclodextrin                                                          | 89                      | 10        |
| 15             | Na <sub>7</sub> [MnV <sub>13</sub> ]·18H <sub>2</sub> O, Ce(NO <sub>3</sub> ) <sub>3</sub> ·6H <sub>2</sub> O, α-cyclodextrin                                                                     | 91                      | 9         |
| 16             | K <sub>5</sub> PW <sub>10</sub> V <sub>2</sub> O <sub>40</sub> , Ce(NO <sub>3</sub> ) <sub>3</sub> ·6H <sub>2</sub> O, α-cyclodextrin                                                             | 81                      | 7         |
| 17             | Na <sub>7</sub> [MnV <sub>13</sub> ]·18H <sub>2</sub> O, K <sub>5</sub> PW <sub>10</sub> V <sub>2</sub> O <sub>40</sub> ,<br>Ce(NO <sub>3</sub> ) <sub>3</sub> ·6H <sub>2</sub> O, α-cyclodextrin | 88                      | 10        |

<sup>a</sup>Reaction conditions: 2a (0.2 mmol), **1** (0.4 mol%), 30% H<sub>2</sub>O<sub>2</sub> (1.05 eq), r.t., methanol (2 mL), 6 h.

<sup>b</sup>Yields are determined by GC-MS using mesitylene as an internal standard. <sup>c</sup>No catalyst.

<sup>d</sup>Na<sub>7</sub>[MnV<sub>13</sub>]·18H<sub>2</sub>O (0.4 mol%). <sup>e</sup>K<sub>5</sub>PW<sub>10</sub>V<sub>2</sub>O<sub>40</sub> (0.8 mol%). <sup>f</sup>Ce(NO<sub>3</sub>)<sub>3</sub>·6H<sub>2</sub>O (2.4 mol%). <sup>g</sup>α-cyclodextrin (0.8 mol%). The “n.d.” means “not detected”.

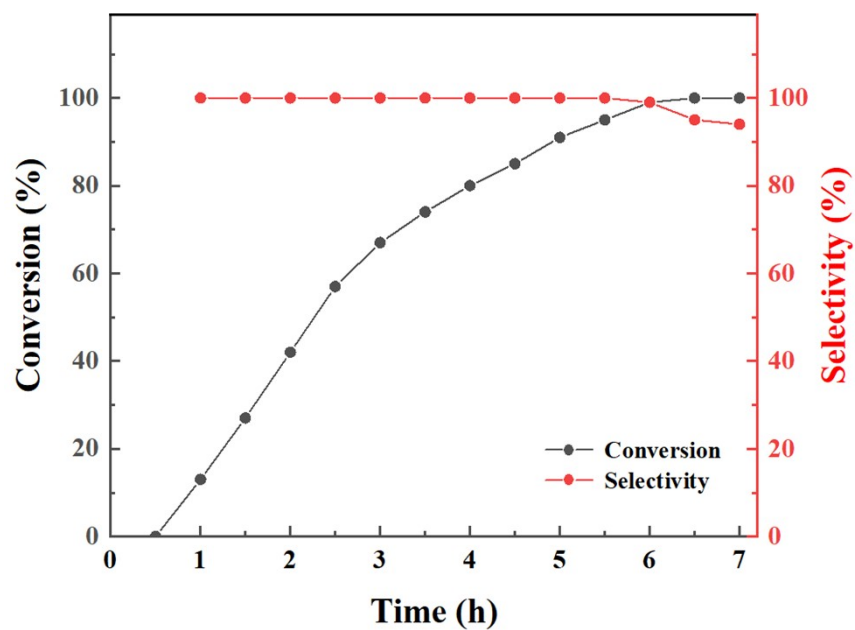

**Figure S17** Relationship between conversion and selectivity of sulfoxidation of thioanisole over time

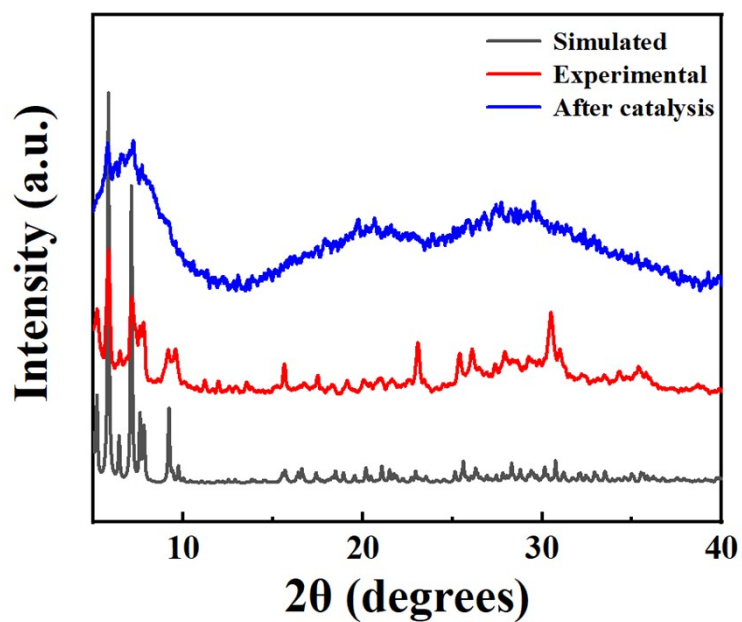

**Figure S18** Comparison of the PXRD patterns of 1 before and after sulfoxidation

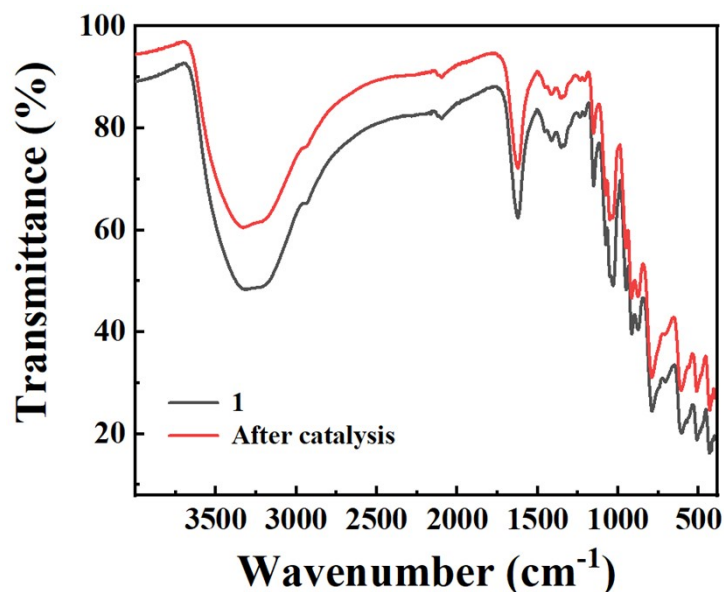

**Figure S19** The FT-IR spectra of **1** before and after catalysis.

**Table S7** Elemental Analysis of **1** after Catalysis

| Element                                     | Mn   | V    | Ce   | P    | W     | C    | H    |
|---------------------------------------------|------|------|------|------|-------|------|------|
| Calculated value (%)                        | 0.52 | 7.78 | 8.02 | 0.59 | 35.10 | 8.25 | 2.46 |
| Actual value (%)                            | 0.59 | 8.04 | 8.27 | 0.59 | 35.45 | 8.34 | 2.45 |
| After catalysis (%)                         | 0.59 | 7.94 | 8.19 | 0.62 | 35.78 | 8.15 | 2.59 |
| Mother liquor after catalyst filtration (%) | 0.01 | 0.13 | 0.13 | 0.02 | 0.55  | -    | -    |

### 13. The general procedure of sulfoxidation by **1-CL<sub>0.5</sub>** at r.t.

**1-CL<sub>0.5</sub>** (0.4 mol%), sulfide (0.2 mmol), H<sub>2</sub>O<sub>2</sub> (1.05 eq), internal standard (mesitylene 0.2 mmol) and solvent (2 mL) are added into the test tube (φ20 mm × 170 mm), and the magnetic stir bar coated with PTFE is added for stirring for 19h at room temperature. After the reaction, the reaction solution is tested by GC-MS, and the products are confirmed by comparison of their GC-Mass spectra with those of authentic data, and the yield is calculated according to the internal standard. After the reaction, the catalyst is deposited at the bottom of the centrifuge tube by centrifugation, which is conducive to the recovery of the catalyst. The recovered catalyst is washed with methanol and dried.

**Table S8 Substrate scope of catalytic oxidation of sulfides<sup>a</sup>**

$$\begin{array}{ccc} \text{R}_1-\text{S}-\text{R}_2 & \xrightarrow[\text{30\% H}_2\text{O}_2 \text{ (1.05 eq), r.t. 19 h}]{\text{1-CL}_{0.5} \\ \text{MeOH (2 mL)}} & \text{R}_1-\overset{\text{O}}{\parallel}{\text{S}}-\text{R}_2 + \text{R}_1-\overset{\text{O}}{\parallel}{\text{S}}(\text{O})-\text{R}_2 \\ \mathbf{2} & & \mathbf{3} \quad \quad \quad \mathbf{4} \end{array}$$

| Entry | Substrate                                                                         |                   | Yields (%) <sup>b</sup> |
|-------|-----------------------------------------------------------------------------------|-------------------|-------------------------|
| 1     |                                                                                   | R=H               | 3a/4a=80/5              |
| 2     | 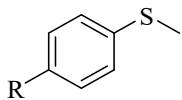 | R=CH <sub>3</sub> | 3b/4b=83/5              |
| 3     |                                                                                   | R=Cl              | 3c/4c=63/2              |
| 4     |  |                   | 3d/4d=94/6              |
| 5     |  |                   | 3e/4e=59/5              |

<sup>a</sup>Reaction conditions: 2a (0.2 mmol), **1-CL<sub>0.5</sub>** (0.4 mol%), 30% H<sub>2</sub>O<sub>2</sub> (1.05 eq), r.t., methanol (2 mL), 19 h. <sup>b</sup>Yields are determined by GC-MS using mesitylene as an internal standard.

#### 14. The general procedure of sulfoxidation by **1-CL<sub>0.5</sub>** at 40 °C.

**1-CL<sub>0.5</sub>** (0.4 mol%), sulfide (0.2 mmol), H<sub>2</sub>O<sub>2</sub> (1.10 eq), internal standard (mesitylene 0.2 mmol) and solvent (2 mL) are added into the test tube (φ20 mm × 170 mm), and the magnetic stir bar coated with PTFE is added for stirring for 6h at 40 °C. After the reaction, the reaction solution is tested by GC-MS, and the products are confirmed by comparison of their GC-Mass spectra with those of authentic data, and the yield is calculated according to the internal standard. After the reaction, the catalyst is deposited at the bottom of the centrifuge tube by centrifugation, which is conducive to the recovery of the catalyst. The recovered catalyst is washed with methanol and dried.

**Table S9 Screening the temperature for catalytic oxidation of sulfides<sup>a</sup>**

| Entry | Temperature (°C) | Yields (%) <sup>b</sup> |      |
|-------|------------------|-------------------------|------|
|       |                  | 3a                      | 4a   |
| 1     | r.t.             | 48                      | n.d. |
| 2     | 40               | 88                      | 4    |
| 3     | 50               | 79                      | 2    |
| 4     | 60               | 80                      | 4    |

<sup>a</sup>Reaction conditions: 2a (0.2 mmol), 1-CL<sub>0.5</sub> (0.4 mol%), 30% H<sub>2</sub>O<sub>2</sub>, methanol (2 mL), 6 h. <sup>b</sup>Yields are determined by GC-MS using mesitylene as an internal standard. The “n.d.” means “not detected”.

**Table S10 Screening the amount of H<sub>2</sub>O<sub>2</sub> for catalytic oxidation of sulfides at 40**

°C<sup>a</sup>

| Entry | Oxidant/substrate (eq) | Yields (%) <sup>b</sup> |    |
|-------|------------------------|-------------------------|----|
|       |                        | 3a                      | 4a |
| 1     | 1.05                   | 87                      | 4  |
| 2     | 1.10                   | 95                      | 5  |
| 3     | 1.15                   | 91                      | 9  |
| 4     | 1.20                   | 85                      | 15 |

<sup>a</sup>Reaction conditions: 2a (0.2 mmol), 1-CL<sub>0.5</sub> (0.4 mol%), 30% H<sub>2</sub>O<sub>2</sub>, 40 °C, methanol (2 mL), 6 h.

<sup>b</sup>Yields were determined by GC-MS using mesitylene as an internal standard.

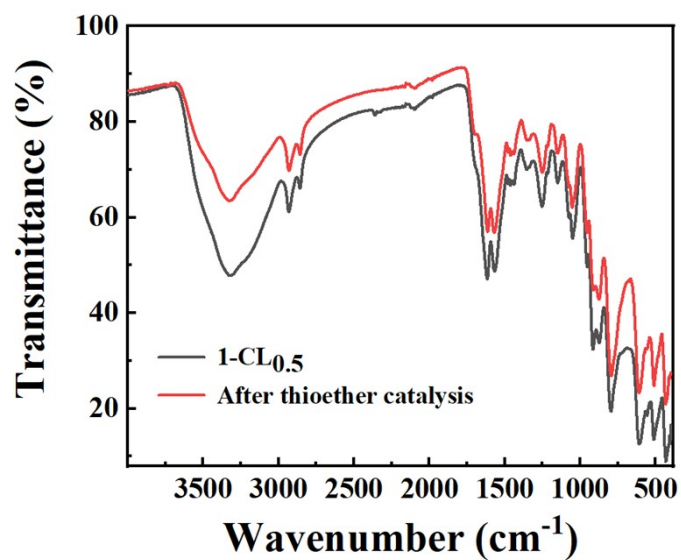

**Figure S20** The FT-IR spectrum of **1-CL<sub>0.5</sub>** before and after thioether catalysis

**Table S11** Elemental Analysis of **1-CL<sub>0.5</sub>** after Catalysis

| Element                                     | Mn     | V      | Ce     | P      | W      | C     | H    | N    |
|---------------------------------------------|--------|--------|--------|--------|--------|-------|------|------|
| Calculated value (%)                        | 0.40   | 5.97   | 6.16   | 0.45   | 26.93  | 22.15 | 3.45 | 4.92 |
| Actual value (%)                            | 0.48   | 6.04   | 6.34   | 0.41   | 27.15  | 22.42 | 3.65 | 4.66 |
| After catalysis (%)                         | 0.40   | 6.15   | 5.94   | 0.47   | 27.27  | 22.46 | 3.53 | 4.60 |
| Mother liquor after catalyst filtration (%) | < 0.01 | < 0.01 | < 0.01 | < 0.01 | < 0.01 | -     | -    | -    |

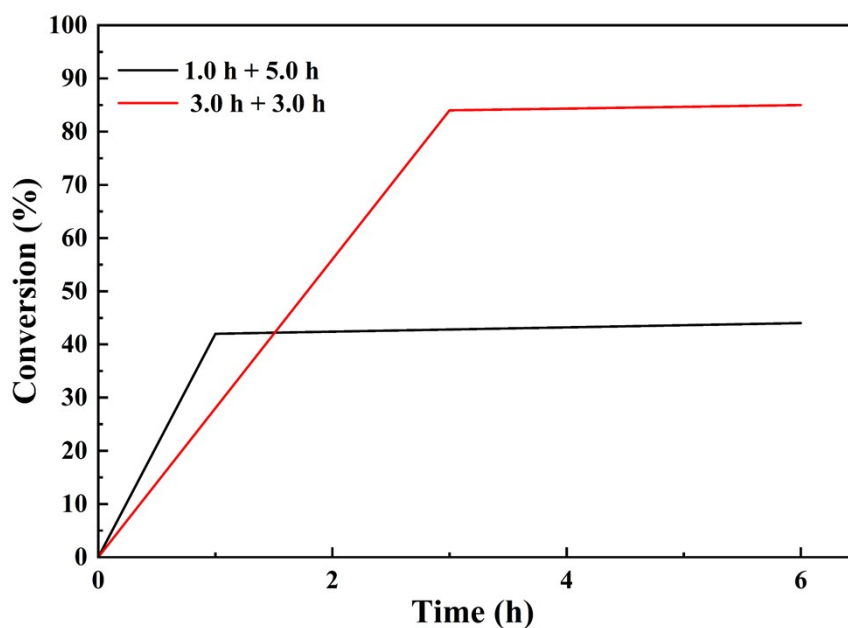

**Figure S21** Hot filtration experiment using **1-CL<sub>0.5</sub>** for the catalytic oxidation of benzyl sulfide.

### 15. General process of oxidative cleavage of alkenes by **1-CL<sub>0.5</sub>**

**1-CL<sub>0.5</sub>** (0.3 mol%), alkene compounds (0.6 mmol), H<sub>2</sub>O<sub>2</sub> (2.5 eq), internal standard (mesitylene/n-Hexadecane 0.2 mmol) and solvent (2 mL) are added into the seal tube, and the magnetic stir bar coated with PTFE is added for stirring at room temperature. After the reaction, the reaction solution is tested by GC-MS, and the products are confirmed by comparison of their GC-Mass spectra with those of authentic data, and the yield is calculated according to the internal standard. 4-Chlorostyrene is taken as a model compound. Similarly, we screen solvent, the amount of catalyst and H<sub>2</sub>O<sub>2</sub>. After the reaction, the catalyst is deposited at the bottom of the centrifuge tube by centrifugation, which is conducive to the recovery of the catalyst. The recovered catalyst is washed with methanol and dried.

**Table S12 Screening the solvents for alkene compounds to aldehydes<sup>a</sup>**

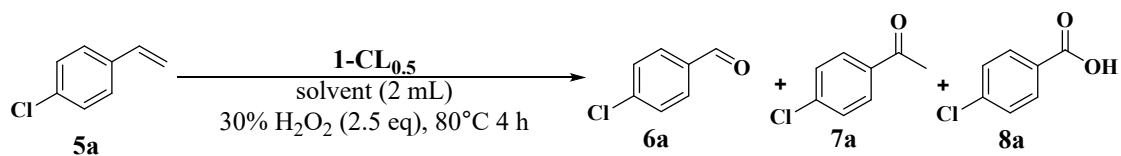

| Entry | solvent               | Yields (%) <sup>b</sup> |      |                 |
|-------|-----------------------|-------------------------|------|-----------------|
|       |                       | 6a                      | 7a   | 8a              |
| 1     | Acetonitrile          | 83                      | 7    | 7               |
| 2     | Ethyl acetate         | 72                      | 9    | 9               |
| 3     | Methanol              | 53 <sup>c</sup>         | 6    | 22 <sup>d</sup> |
| 4     | Ethanol               | 70 <sup>e</sup>         | 4    | 10 <sup>f</sup> |
| 5     | Tetrahydrofuran       | 16                      | 13   | n.d.            |
| 6     | Acetone               | 65                      | 14   | 5               |
| 7     | 1,4-Dioxane           | 34                      | 4    | 2               |
| 8     | N,N-Dimethylformamide | 21                      | 8    | 4               |
| 9     | Dimethyl sulfoxide    | 10                      | n.d. | n.d.            |
| 10    | Dichloromethane       | n.d.                    | n.d. | n.d.            |
| 11    | Dichloroethane        | n.d.                    | n.d. | n.d.            |
| 12    | Trichloromethane      | n.d.                    | n.d. | n.d.            |
| 13    | Toluene               | n.d.                    | n.d. | n.d.            |

<sup>a</sup>Reaction conditions: 5a (0.6 mmol), 1-CL<sub>0.5</sub> (0.05 mol%), 30% H<sub>2</sub>O<sub>2</sub> (2.5 eq), 80 °C, 4 h. <sup>b</sup>Yields are determined by GC-MS using mesitylene as an internal standard. <sup>c</sup>Yields include aldehydes and acetals. <sup>d</sup>The yield of methyl benzoate. <sup>e</sup>Yields include aldehydes and acetals. <sup>f</sup>The yield of ethyl benzoate. The “n.d.” means “not detected”.



**Table S13 Screening the temperature for alkene compounds to aldehydes<sup>a</sup>**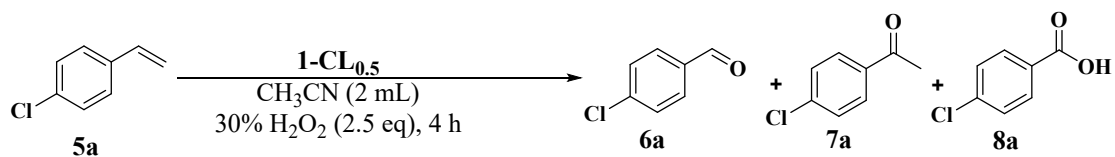

| Entry | Temperature (°C) | Yields (%) <sup>b</sup> |    |    |
|-------|------------------|-------------------------|----|----|
|       |                  | 6a                      | 7a | 8a |
| 1     | 70               | 84                      | 5  | 6  |
| 2     | 80               | 88                      | 5  | 7  |
| 3     | 90               | 85                      | 4  | 6  |

<sup>a</sup>Reaction conditions: 5a (0.2 mmol), 1-CL<sub>0.5</sub> (0.05 mol%), 30% H<sub>2</sub>O<sub>2</sub>, acetonitrile (2 mL), 4 h.

<sup>b</sup>Yields are determined by GC-MS using mesitylene as an internal standard.

**Table S14 Screening the amount of catalyst for alkene compounds to aldehydes<sup>a</sup>**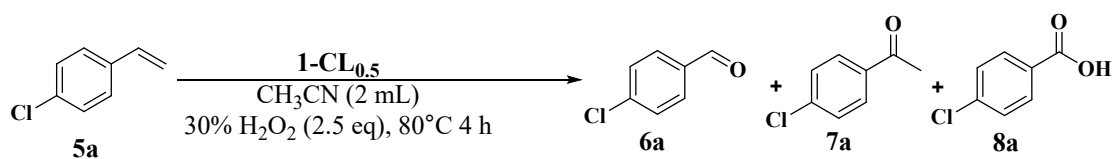

| Entry | Amount of catalyst (mol%) | Yields (%) <sup>b</sup> |    |    |
|-------|---------------------------|-------------------------|----|----|
|       |                           | 6a                      | 7a | 8a |
| 1     | 0.025                     | 74                      | 8  | 4  |
| 2     | 0.050                     | 88                      | 5  | 7  |
| 3     | 0.100                     | 75                      | 8  | 10 |

<sup>a</sup>Reaction conditions: 5a (0.6 mmol), 30% H<sub>2</sub>O<sub>2</sub> (2.5 eq), 80 °C, acetonitrile (2 mL), 4 h. <sup>b</sup> Yields are determined by GC-MS using mesitylene as an internal standard.

**Table S15 Screening the amount of H<sub>2</sub>O<sub>2</sub> for alkene compounds to aldehydes <sup>a</sup>**

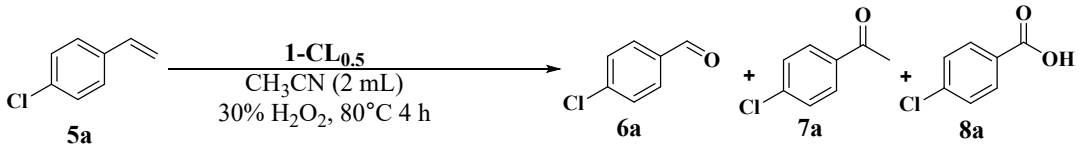

| Entry | Oxidant/substrate (eq) | Yields (%) <sup>b</sup> |    |    |
|-------|------------------------|-------------------------|----|----|
|       |                        | 6a                      | 7a | 8a |
| 1     | 2.0                    | 71                      | 7  | 2  |
| 2     | 2.2                    | 75                      | 7  | 5  |
| 3     | 2.3                    | 86                      | 5  | 4  |
| 4     | 2.4                    | 86                      | 2  | 7  |
| 5     | 2.5                    | 88                      | 5  | 7  |
| 6     | 2.6                    | 85                      | 5  | 9  |
| 7     | 2.8                    | 71                      | 6  | 23 |
| 8     | 3.0                    | 65                      | 6  | 28 |

<sup>a</sup>Reaction conditions: 5a (0.2 mmol), 1-CL<sub>0.5</sub> (0.05 mol%), 30% H<sub>2</sub>O<sub>2</sub>, 80 °C, acetonitrile (2 mL), 4 h. <sup>b</sup>Yields are determined by GC-MS using mesitylene as an internal standard.

**Table S16 Screening time for alkene compounds to aldehydes <sup>a</sup>**

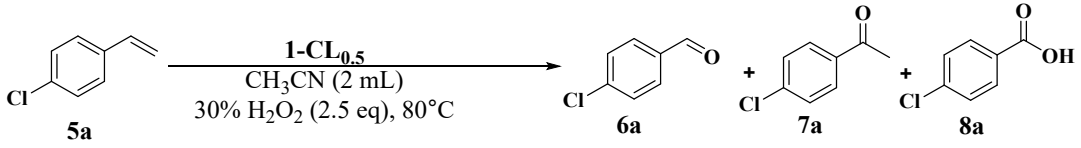

| Entry | Time (h) | Yields (%) <sup>b</sup> |    |      |
|-------|----------|-------------------------|----|------|
|       |          | 6a                      | 7a | 8a   |
| 1     | 2.0      | 76                      | 5  | n.d. |
| 2     | 3.0      | 84                      | 6  | n.d. |
| 3     | 3.5      | 82                      | 5  | 4    |
| 4     | 4.0      | 88                      | 5  | 7    |
| 5     | 4.5      | 85                      | 5  | 9    |

<sup>a</sup>Reaction conditions: 5a (0.2 mmol), 1-CL<sub>0.5</sub> (0.05 mol%), 30% H<sub>2</sub>O<sub>2</sub> (2.5 eq), 80 °C, acetonitrile (2 mL). <sup>b</sup>Yields were determined by GC-MS using mesitylene as an internal standard. The “n.d.” means “not detected”.

**Table S17 catalytic oxygenation of 5a using various catalysts and acetonitrile as**

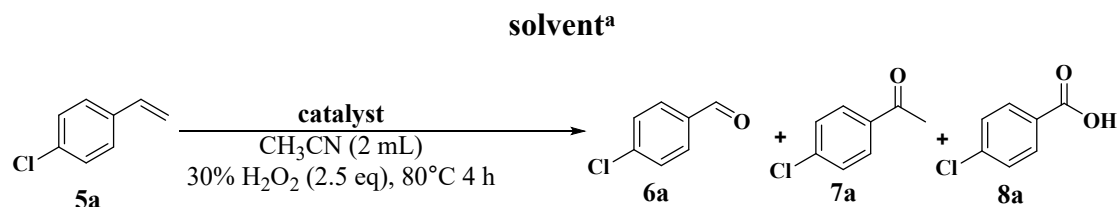

| Entry          | Catalyst                                                                                                                                                                                          | Yields (%) <sup>b</sup> |    |      |
|----------------|---------------------------------------------------------------------------------------------------------------------------------------------------------------------------------------------------|-------------------------|----|------|
|                |                                                                                                                                                                                                   | 6a                      | 7a | 8a   |
| 1              | 1-CL <sub>0.5</sub>                                                                                                                                                                               | 88                      | 5  | 7    |
| 2 <sup>c</sup> | —                                                                                                                                                                                                 | 25                      | 5  | n.d. |
| 3 <sup>d</sup> | Na <sub>7</sub> [MnV <sub>13</sub> ]·18H <sub>2</sub> O                                                                                                                                           | 51                      | 2  | n.d. |
| 4 <sup>e</sup> | K <sub>5</sub> PW <sub>10</sub> V <sub>2</sub> O <sub>40</sub>                                                                                                                                    | 24                      | 10 | n.d. |
| 5 <sup>f</sup> | Ce(NO <sub>3</sub> ) <sub>3</sub> ·6H <sub>2</sub> O                                                                                                                                              | 28                      | 3  | n.d. |
| 6 <sup>g</sup> | α-cyclodextrin                                                                                                                                                                                    | 15                      | 4  | n.d. |
| 7              | Na <sub>7</sub> [MnV <sub>13</sub> ]·18H <sub>2</sub> O, K <sub>5</sub> PW <sub>10</sub> V <sub>2</sub> O <sub>40</sub>                                                                           | 26                      | 2  | n.d. |
| 8              | Na <sub>7</sub> [MnV <sub>13</sub> ]·18H <sub>2</sub> O, Ce(NO <sub>3</sub> ) <sub>3</sub> ·6H <sub>2</sub> O                                                                                     | 63                      | 10 | 14   |
| 9              | Na <sub>7</sub> [MnV <sub>13</sub> ]·18H <sub>2</sub> O, α-cyclodextrin                                                                                                                           | 34                      | 5  | n.d. |
| 10             | K <sub>5</sub> PW <sub>10</sub> V <sub>2</sub> O <sub>40</sub> , Ce(NO <sub>3</sub> ) <sub>3</sub> ·6H <sub>2</sub> O                                                                             | 25                      | 8  | n.d. |
| 11             | Na <sub>7</sub> [MnV <sub>13</sub> ]·18H <sub>2</sub> O, K <sub>5</sub> PW <sub>10</sub> V <sub>2</sub> O <sub>40</sub> , Ce(NO <sub>3</sub> ) <sub>3</sub> ·6H <sub>2</sub> O                    | 68                      | 21 | 2    |
| 12             | K <sub>5</sub> PW <sub>10</sub> V <sub>2</sub> O <sub>40</sub> , α-cyclodextrin                                                                                                                   | 27                      | 12 | n.d. |
| 13             | Ce(NO <sub>3</sub> ) <sub>3</sub> ·6H <sub>2</sub> O, α-cyclodextrin                                                                                                                              | 6                       | 3  | n.d. |
| 14             | Na <sub>7</sub> [MnV <sub>13</sub> ]·18H <sub>2</sub> O, K <sub>5</sub> PW <sub>10</sub> V <sub>2</sub> O <sub>40</sub> , α-cyclodextrin                                                          | 38                      | 11 | n.d. |
| 15             | Na <sub>7</sub> [MnV <sub>13</sub> ]·18H <sub>2</sub> O, Ce(NO <sub>3</sub> ) <sub>3</sub> ·6H <sub>2</sub> O, α-cyclodextrin                                                                     | 8                       | 4  | n.d. |
| 16             | K <sub>5</sub> PW <sub>10</sub> V <sub>2</sub> O <sub>40</sub> , Ce(NO <sub>3</sub> ) <sub>3</sub> ·6H <sub>2</sub> O, α-cyclodextrin                                                             | 58                      | 21 | n.d. |
| 17             | Na <sub>7</sub> [MnV <sub>13</sub> ]·18H <sub>2</sub> O, K <sub>5</sub> PW <sub>10</sub> V <sub>2</sub> O <sub>40</sub> ,<br>Ce(NO <sub>3</sub> ) <sub>3</sub> ·6H <sub>2</sub> O, α-cyclodextrin | 68                      | 11 | 5    |

<sup>a</sup>Reaction conditions: 5a (0.6 mmol), **1-CL<sub>0.5</sub>** (0.05 mol%), 30% H<sub>2</sub>O<sub>2</sub> (2.5 eq), 80 °C, acetonitrile (2 mL), 4 h. <sup>b</sup>Yields are determined by GC-MS using mesitylene/n-Hexadecane as an internal standard. <sup>c</sup>No catalyst. <sup>d</sup>Na<sub>7</sub>[MnV<sub>13</sub>]·18H<sub>2</sub>O (0.05 mol%). <sup>e</sup>K<sub>5</sub>PW<sub>10</sub>V<sub>2</sub>O<sub>40</sub> (0.1 mol%). <sup>f</sup>Ce(NO<sub>3</sub>)<sub>3</sub>·6H<sub>2</sub>O (0.3 mol%). <sup>g</sup>α-cyclodextrin (0.1 mol%). The “n.d.” means “not detected”.

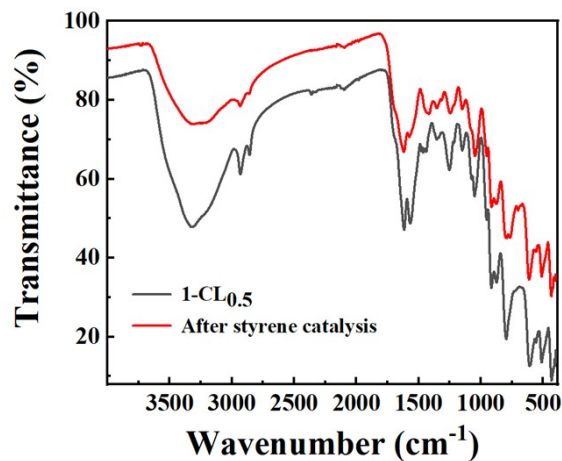

**Figure S22** The FT-IR spectra of **1-CL<sub>0.5</sub>** and after styrene catalysis

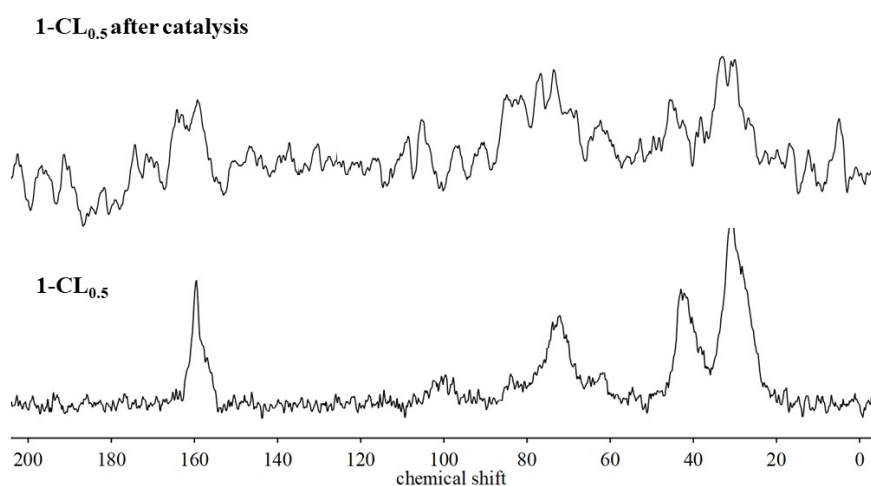

**Figure S23** <sup>13</sup>C solid-state NMR spectrum of **1-CL<sub>0.5</sub>** and after styrene catalysis

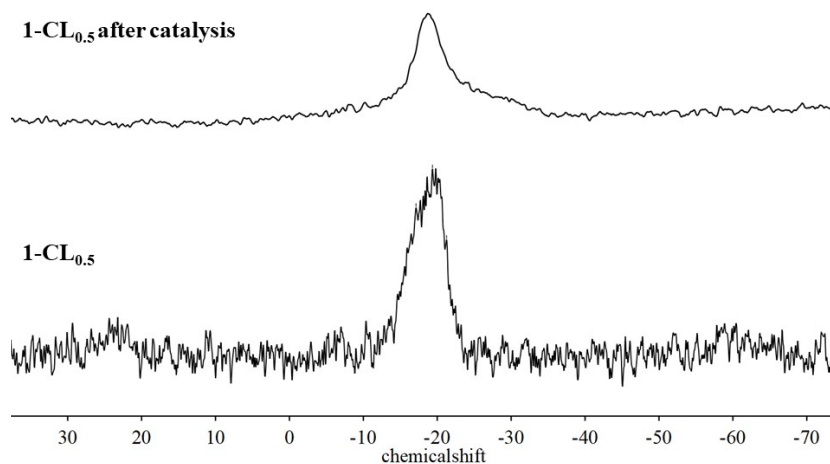

**Figure S24**  $^{31}\text{P}$  solid-state NMR spectrum of **1-CL<sub>0.5</sub>** and after styrene catalysis

**Table S18 Elemental Analysis of 1-CL<sub>0.5</sub> after Catalysis**

| Element                                     | Mn     | V      | Ce     | P      | W      | C     | H    | N    |
|---------------------------------------------|--------|--------|--------|--------|--------|-------|------|------|
| Calculated value (%)                        | 0.40   | 5.97   | 6.16   | 0.45   | 26.93  | 22.15 | 3.45 | 4.92 |
| Actual value (%)                            | 0.48   | 6.04   | 6.34   | 0.41   | 27.15  | 22.42 | 3.65 | 4.66 |
| After catalysis (%)                         | 0.41   | 6.14   | 5.92   | 0.44   | 27.38  | 22.39 | 3.34 | 4.70 |
| Mother liquor after catalyst filtration (%) | < 0.01 | < 0.01 | < 0.01 | < 0.01 | < 0.01 | -     | -    | -    |

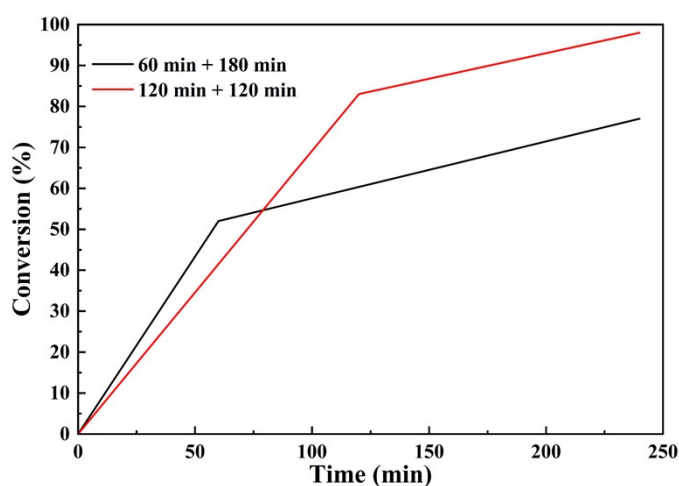

**Figure S25** Hot filtration experiment using **1-CL<sub>0.5</sub>** for the catalytic oxidation of p-chlorostyrene.

## 16. Recycling experiments.

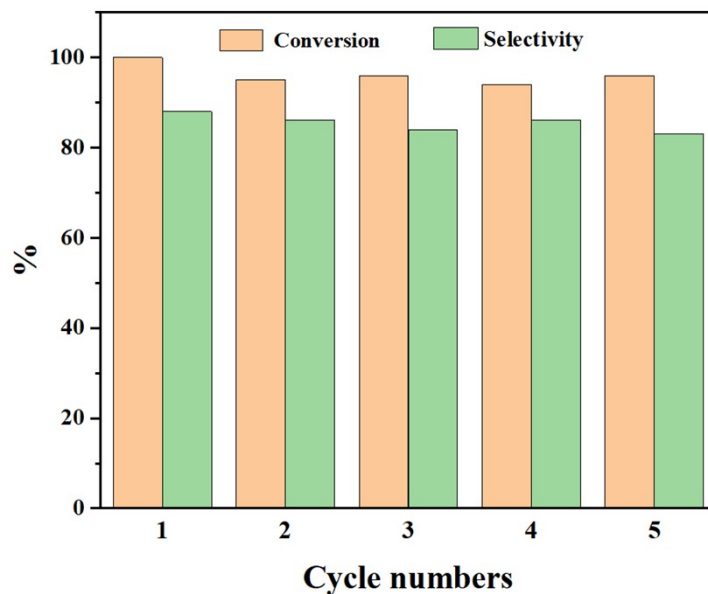

**Fig. S26** Recycling experiments for the catalytic oxidation of 4-Chlorostyrene.

### 17. References

1. C. M. Flynn, M. T. Pope, *J. Am. Chem. Soc.*, 1970, 92, 85.
2. A. P. Ginsberg (1990). *Inorg. Synth.* 27, 108.
3. Domaille P J. *J. Am. Chem. Soc.*, 1984, 106(25):7677-7687.
4. G. M. Sheldrick, SADABS. University of Gottingen, Germany, Standard Software References, 1996.
5. G. M. Sheldrick, *Acta Crystallographica Section A: Found. Adv.*, 2015, 71, 3-8.
6. G. M. Sheldrick, *Acta Crystallogr. Sect. C: Struct. Chem.*, 2015, 71, 3-8.
7. O. V. Dolomanov, L. J. Bourhis, R. J. Gildea, J. A. K. Howard and H. Puschmann, *J. Appl. Cryst.*, 2009, 42, 339-341
